# Supplementary material for: XPG rs17655 G>C polymorphism associated with cancer risk: evidence from 60 studies
Source: publisher site journal article supplement (doi:10.18632/aging.101448), 2018-05-20
Supplement: Supplementary file [file aging-v10i5-101448-supplementary-material-SD1.pdf]

SUPPLEMENTARY MATERIAL

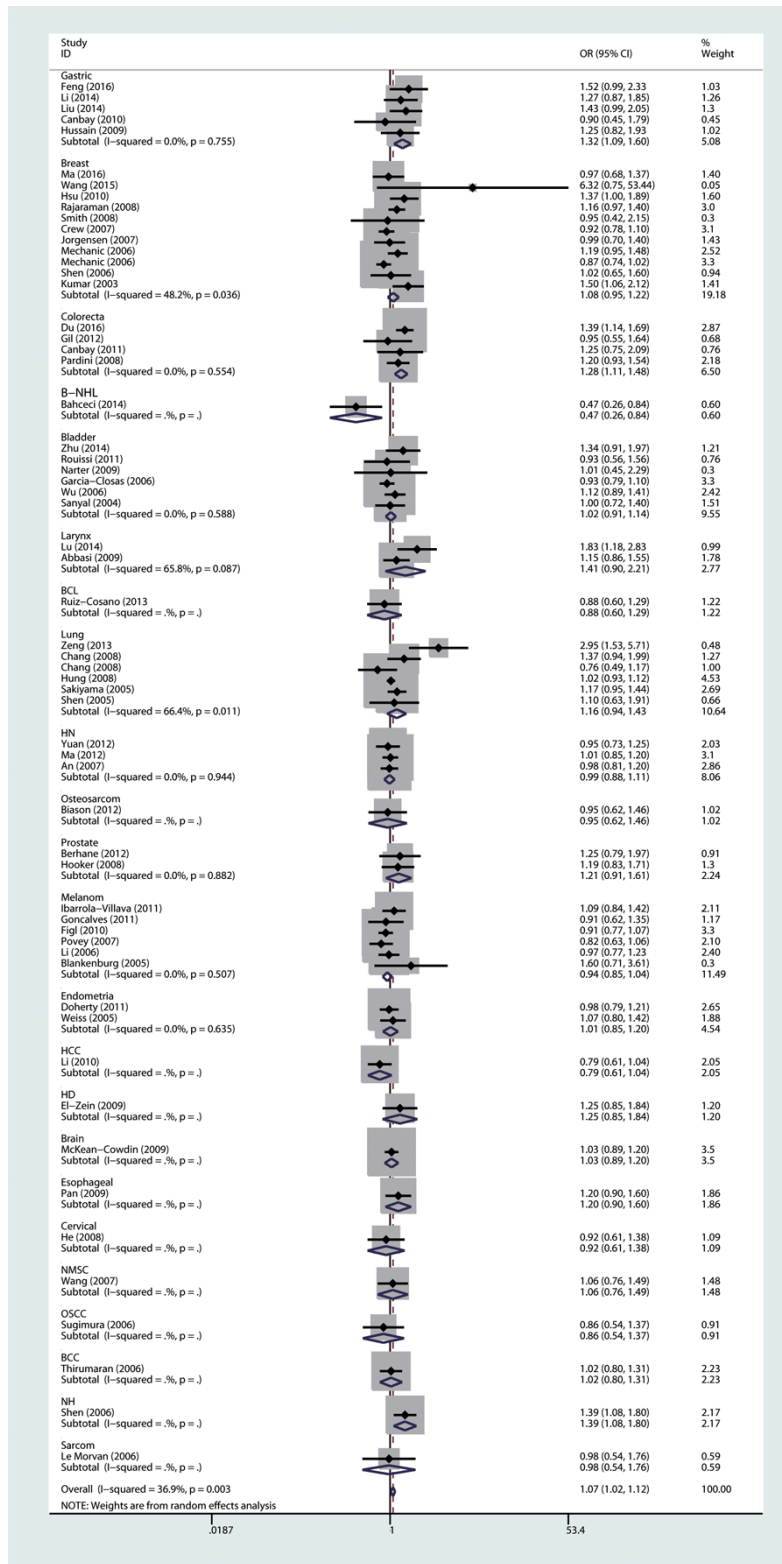

Supplemental Figure 1. Stratification analysis for the association between the XPG rs17655 G>C polymorphism and cancer risk by cancer type under the dominant model. For each publication, the estimation of OR and its 95%CI was plotted with a box and a horizontal line. The diamonds represented the pooled ORs and 95% CIs. Note: P value could not be calculated for single study.
